# Supplementary material for: Comparative Lipidomic Profiling of S. cerevisiae and Four Other Hemiascomycetous Yeasts
Source: Metabolites. 2012 Mar 2;2(1):254–67. doi: 10.3390/metabo2010254 (PMC3901198; doi:10.3390/metabo2010254)
Supplement: Supplementary File 1 — XLS-Document (XLS, 83 KB) [file metabolites-02-00254-s001.xls]

## Sheet: all data
	S. cerevisiae		S. bayanus		K. thermotolerans		P. angusta		Y. lipolytica
GP	average [%]	SD [%]	average [%]	SD [%]	average [%]	SD [%]	average [%]	SD [%]	average [%]	SD [%]
CA(58:1)			0.832017	0.0711798
CA(58:2)			1.78133	0.178663
CA(58:3)			2.08459	0.184899
CA(60:1)			1.11072	0.119648
CA(60:2)			3.15125	0.306779
CA(60:3)			4.0598	0.449098
CA(62:2)			1.85586	0.129688
CA(62:3)			4.01453	0.479236
CA(64:2)	2.2847	0.280651	1.53796	0.0504299
CA(64:3)	3.85384	0.243897	3.39375	0.0778948
CA(64:4)	3.20339	0.335386	11.7185	0.673656
CA(66:2)	4.40285	0.463882	2.18721	0.0789904	1.17869	0.136385
CA(66:3)	9.89144	0.684607	5.10392	0.183334	2.18597	0.13021
CA(66:4)	13.8423	0.595929	22.0236	0.823909	1.92242	0.253066
CA(66:5)					1.12774	0.220883
CA(68:2)	4.65835	0.320537	1.35274	0.0777201	2.79822	0.134297	2.03633	0.210912
CA(68:3)	14.3641	0.613085	3.93001	0.11302	6.15293	0.480906	2.93542	0.246603
CA(68:4)	23.3098	1.20154	17.0432	0.489951	8.15288	0.740443	1.70139	0.114999	0.42272	0.0519076
CA(68:5)					5.98236	1.4855			0.470914	0.0476778
CA(68:6)					3.75016	0.380204
CA(68:7)					1.72014	0.32855
CA(70:3)	4.30858	0.320866
CA(70:4)	13.477	1.03333	5.8307	0.225326	6.48785	0.4631	1.88964	0.140795	1.58839	0.185965
CA(70:5)					10.2339	0.60139	4.2965	0.448086	4.83517	0.421816
CA(70:6)			0.975227	0.0596122	10.0279	2.64609	4.72655	0.465973	7.17469	0.543942
CA(70:7)			4.59157	0.173977	7.44411	0.689939	2.36214	0.283899	4.31191	0.469509
CA(70:8)					3.74109	0.685065	0.64938	0.0963022	0.330688	0.0308613
CA(70:9)					0.985073	0.180195
CA(72:4)	2.40367	0.311701							0.930458	0.10912
CA(72:5)					2.92707	0.194029	0.624215	0.0806166	6.74079	0.7383
CA(72:6)					4.45469	0.434358	2.22408	0.194937	21.2532	1.63592
CA(72:7)			1.42153	0.0592426	5.86966	0.611322	5.63448	0.316859	30.2048	2.8955
CA(72:8)					4.91559	0.393811	13.8232	1.3686	21.7362	5.96713
CA(72:9)					3.06458	0.455845	21.2979	0.803475
CA(72:10)							13.2027	0.785376
CA(72:11)							3.93502	0.473574
CA(72:12)							0.380136	0.0351681
CA(74:9)					1.04166	0.145307	0.585086	0.0669696
CA(74:10)					1.46251	0.0947244	1.53827	0.109465
CA(74:11)					1.39048	0.0878727	4.12751	0.255951
CA(74:12)					0.982246	0.193941	6.23623	0.194887
CA(74:13)							3.97844	0.257681
CA(74:14)							1.104	0.156843
CA(76:6)							0.711371	0.264262
PG(26:0)			5.6034	0.748793
PG(28:0)			7.71088	0.882128
PG(32:1)			40.8467	1.62662	8.47981	1.29659
PG(32:2)	x		2.71905	0.887701
PG(34:1)			43.1199	2.20902	53.0151	2.46802	59.0416	1.28734	60.195	2.18679
PG(34:2)					38.5051	1.38018	32.1877	1.3549	37.5099	2.08987
PG(34:3)							4.47976	0.401377	2.29508	0.131184
PG(36:2)							3.63429	0.355294
PG(36:6)							0.656671	0.0485463
PA(26:0)			8.02306	1.11186
PA(32:1)			45.9673	3.20726	x
PA(32:2)			46.0096	4.04625
PA(34:1)					x		57.1009	1.06421	7.30826	0.544866
PA(34:2)									8.51135	0.529512
PA(34:3)									1.51685	0.163618
PA(36:1)							17.0476	1.39932
PA(36:2)							20.7378	0.874072	54.3164	1.88551
PA(36:3)									23.0141	0.908908
PA(36:3)									5.33302	0.459008
PA(36:5)							2.94428	0.967941
PA(36:6)							2.16943	0.568352
PE(26:0)	0.052058	0.0130924	0.110175	0.019167
PE(26:1)	0.05389	0.0287707	0.565688	0.220508
PE(28:0)	0.13829	0.0566838
PE(28:1)	0.736764	0.0827444	1.4406	0.410498	0.0267899	0.0130744
PE(30:1)	0.546377	0.0698536	0.784892	0.0841117
PE(30:2)	0.178687	0.0441394	0.458404	0.0985545	0.0448136	0.0160331
PE(32:0)	0.23736	0.164609			0.377958	0.14531
PE(32:1)	6.65282	1.09771	7.46593	0.0932676	2.66156	0.295185			0.353969	0.0151855
PE(32:2)	19.7209	2.08836	45.2859	1.35378	8.19067	0.861016			0.25818	0.0966531
PE(32:3)					0.427174	0.0604424			0.0232654	0.00373207
PE(32:4)					0.047821	0.0175652
PE(33:1)	0.323018	0.0347089							0.176537	0.0157819
PE(33:2)	0.552365	0.0948122
PE(34:0)					0.194901	0.0883127
PE(34:1)	16.1771	1.61587	5.03302	0.565733	12.2988	2.16095	11.2201	0.283854	12.7118	0.8337
PE(34:2)	50.788	0.956131	36.2899	1.07417	33.3841	2.03708	17.3174	1.41632	22.0929	0.439581
PE(34:3)					17.4973	1.48074	1.02697	0.0856404	4.47893	0.470792
PE(34:4)					4.79246	0.89956	0.159957	0.0192067
PE(34:5)							0.048933	0.00526542
PE(35:1)							0.312816	0.0241946	0.166544	0.188654
PE(35:2)							0.665845	0.0711796	1.1625	0.111106
PE(35:3)									0.330694	0.0358308
PE(35:4)							0.110706	0.0138224
PE(35:5)							0.130854	0.0196834
PE(35:6)							0.0323011	0.00304098
PE(36:1)					0.503723	0.0875786	1.67358	0.100284	0.362721	0.120803
PE(36:2)	3.84235	0.209854	2.56555	0.267363	1.64469	0.198603	22.3423	0.903246	23.2015	0.441296
PE(36:3)					5.58244	0.371776	17.1635	0.653683	26.5003	0.699023
PE(36:4)					6.38327	1.72779	10.9316	0.188706	6.77159	0.278351
PE(36:5)					5.13919	1.00068	13.4547	0.582629
PE(36:6)					0.80234	0.15574	3.40854	0.114674
PE(38:2)									0.675967	0.186143
PE(38:3)									0.584546	0.229539
PE(38:4)									0.0965184	0.00312002
MMPE(32:1)	17.5967	3.42033
MMPE(32:2)	29.8768	3.19685	63.8038	1.63018
MMPE(34:1)									6.91057	1.2554
MMPE(34:2)	52.5265	2.7181	36.1962	1.63018					22.6896	0.749943
MMPE(34:3)					x				6.5824	1.98477
MMPE(36:2)									27.388	0.517389
MMPE(36:3)									36.4294	1.00569
DMPE(32:1)	4.70284	0.69608
DMPE(32:2)	34.777	2.16825
DMPE(34:1)	10.6526	1.10333			10.5186	1.73554	31.184	0.939039	8.15089	3.16013
DMPE(34:2)	49.8676	1.85588	x		37.6313	2.46218	7.747	0.603446	50.9249	3.47751
DMPE(34:3)					38.4085	2.39737	3.64808	0.335934
DMPE(34:4)					13.4416	3.35042
DMPE(36:2)							13.0985	0.87255	8.00655	1.84123
DMPE(36:3)							25.6406	1.39081	17.9177	1.52244
DMPE(36:4)							6.39569	0.822196	11.7651	1.02287
DMPE(36:5)							5.00418	1.30532
DMPE(36:6)							7.28188	0.690272
DMPE(38:2)									0.919445	0.19629
DMPE(38:3)									2.31535	0.284251
PC(24:0)			0.0998799	0.0795046
PC(24:1)			0.296865	0.200323
PC(26:0)	0.0700522	0.0276577
PC(26:1)	0.19284	0.0734438	0.967815	0.342377
PC(28:0)	0.249653	0.0485287	0.149137	0.0264814
PC(28:1)	1.61401	0.335687	1.51009	0.21952
PC(30:1)	1.94125	0.329291	1.03924	0.0417157	0.0972647	0.00854233
PC(30:2)	1.24816	0.340163
PC(31:1)	0.202474	0.0410203
PC(31:2)	0.226864	0.06552
PC(32:1)	8.83677	1.37846	5.67649	0.700739	3.17184	0.476455	0.290903	0.0928521	0.945375	0.0263429
PC(32:2)	33.3365	11.9539	63.301	1.41417	8.8438	1.05341			1.07677	0.062163
PC(32:3)					0.623231	0.0878763
PC(33:2)	0.153112	0.0458083					0.0808588	0.00509617	0.137802	0.00666871
PC(33:3)							0.0911803	0.0128437
PC(34:0)					0.142497	0.0921751
PC(34:1)	6.72617	3.24685	1.5367	0.35662	6.12562	1.24462	3.20457	0.190741	5.8777	0.314364
PC(34:2)	40.6778	12.2177	24.3225	1.04041	19.6902	1.52234	8.06523	0.497617	16.0165	0.287284
PC(34:3)					27.3765	1.16925	9.38532	0.245775	15.5334	0.308967
PC(34:4)					11.3889	1.60238	2.63093	0.18314	1.9436	0.0877441
PC(34:5)							0.556664	0.0528348
PC(34:6)							0.101734	0.0169223
PC(35:1)							0.126855	0.0124155
PC(35:2)							0.341037	0.0297941	0.327739	0.0273456
PC(35:3)							0.527394	0.0535103	0.707854	0.0773934
PC(35:4)							0.328416	0.0239091	0.283249	0.0462078
PC(35:5)							0.295861	0.0261005
PC(35:6)							0.255102	0.0229342
PC(36:1)	1.08974	0.272698			1.78728	0.501877	2.15607	0.23099	0.235804	0.092983
PC(36:2)	3.43463	0.743571	1.10034	0.208878	5.1761	0.662239	5.79798	0.189261	9.67727	0.449101
PC(36:3)					5.63582	0.290437	15.7597	0.39204	23.5401	0.626934
PC(36:4)					4.9597	0.878606	16.7768	0.44751	21.93	0.651781
PC(36:5)					4.83148	1.02115	19.812	0.978805
PC(36:6)							11.8315	0.32842
PC(36:7)							0.062608	0.005475
PC(38:2)							0.116229	0.0195602	0.363935	0.0683016
PC(38:3)					0.149644	0.0140884	0.395066	0.0307767	1.18425	0.0582495
PC(38:4)							0.87789	0.0599129	0.218533	0.0546718
PC(42:2)							0.0294073	0.00443232
PC(42:3)							0.0375753	0.00911352
PC(44:3)							0.0650481	0.0107965
PI(26:0)	1.94709	0.382393
PI(26:1)	0.218034	0.0838051
PI(27:0)	0.0251951	0.00594738
PI(28:0)	4.95367	0.239998	12.8908	0.620944	0.574404	0.17893
PI(28:1)	0.671803	0.167175	0.673852	0.0542543	0.0350908	0.0101493
PI(30:0)	1.50791	0.185594	1.55574	0.0741332	0.529405	0.0496475
PI(30:1)	2.28582	0.468321	3.44348	0.195732	0.615452	0.0712922
PI(30:2)	0.162468	0.0600719	0.0646661	0.012154	0.0367941	0.0097083
PI(31:1)	0.154159	0.0318437	0.137102	0.00645186	0.0504446	0.00518499
PI(31:2)	0.0235716	0.0137314
PI(32:0)	1.25329	0.38995	1.27754	0.110011	1.31776	0.121834
PI(32:1)	20.9169	1.45244	37.1739	0.766949	11.2751	0.557853	0.532025	0.0217996	0.472986	0.0306878
PI(32:2)	6.03767	1.79526	3.83948	0.229083	2.93056	0.265471	0.387575	0.020641	0.538737	0.030745
PI(32:3)					0.33925	0.041037	0.0536595	0.00757111	0.0120577	0.000967615
PI(33:1)	0.39087	0.0287126	0.259482	0.0125677	0.285486	0.0324371	0.412913	0.0226113	0.429926	0.019881
PI(33:2)	0.0347137	0.00939132			0.142435	0.0124777	0.432438	0.113096	0.622412	0.0766455
PI(33:3)					0.0365098	0.0112843	0.115135	0.00957295
PI(34:0)	0.92069	0.360348	0.315624	0.0270005	0.516856	0.0628658
PI(34:1)	34.0791	2.23382	32.4034	0.861789	32.7337	1.27282	26.0338	0.565278	25.3517	1.43321
PI(34:2)	7.57357	2.11117	2.79402	0.0775665	24.5818	1.79371	26.8642	1.11409	37.1184	0.926741
PI(34:3)					5.46504	0.438517	5.80098	0.216191	7.74311	0.337787
PI(34:4)					0.968225	0.112174	0.221233	0.0219318	0.284196	0.0240912
PI(34:5)					0.02394	0.00761
PI(35:1)							0.783965	0.0482229
PI(35:2)							1.16221	0.124351	0.373394	0.0447945
PI(35:3)							0.264628	0.0220791	0.304635	0.0330433
PI(35:4)							0.101401	0.00462651	0.0964294	0.0132503
PI(35:5)							0.0399839	0.00354705
PI(36:0)	0.222286	0.0871728
PI(36:1)	15.8366	1.3943	2.97466	0.127183	8.78299	0.83059	5.66906	0.289573	1.07891	0.192188
PI(36:2)	0.784498	0.0938612	0.196232	0.00757977	4.51681	0.304711	10.7292	0.401733	11.3689	0.613679
PI(36:3)					1.37176	0.0407881	6.43722	0.221031	7.27033	0.701383
PI(36:4)					0.760227	0.0453047	7.38077	0.172091	6.86716	0.457816
PI(36:5)					0.480687	0.0643506	5.13369	0.3785
PI(36:6)					0.0907564	0.0153342	1.44395	0.151827
PI(40:1)					0.0493006	0.0052931
PI(42:0)					0.0697285	0.018192
PI(42:1)					0.260175	0.0486955			0.0324742	0.00574594
PI(42:2)					0.0665839	0.00962725			0.0342212	0.00752545
PI(43:1)					0.151115	0.034849
PI(43:2)					0.0930781	0.0247705
PI(44:1)					0.46374	0.0891543
PI(44:2)					0.334659	0.0685861
PI(44:3)					0.050214	0.0120272
PS(26:0)							0.303648	0.020892
PS(26:1)							0.193379	0.0376883
PS(28:0)	0.453927	0.040573			0.126205	0.0735568	0.704714	0.0251291
PS(28:1)	0.450703	0.13703					1.25938	0.0904524
PS(30:0)	0.140972	0.0534394			0.258562	0.0823302	0.202917	0.0210871
PS(30:1)	1.0264	0.21755			0.427733	0.135216	1.61939	0.12137
PS(30:2)	0.0695508	0.0522676					0.250611	0.0380893
PS(32:0)	0.773603	0.343243			0.918765	0.162402
PS(32:1)	14.5183	1.10957			9.99125	0.751542	15.0479	0.882994	0.822143	0.100197
PS(32:2)	11.6589	3.73828	0.0953249	0.0110657	4.54833	0.446533	20.0302	1.17525	0.297556	0.0252928
PS(32:3)					0.30152	0.0759122
PS(33:1)	1.1406	0.20406
PS(33:2)									0.515222	0.0382318
PS(34:1)	29.5851	3.20955	53.2698	1.18849	39.0621	1.53813	18.0761	0.532482	44.8883	1.10323
PS(34:2)	40.182	1.78925	21.5771	1.05386	31.5401	1.85992	42.3117	2.23194	27.5651	0.957582
PS(34:3)			5.20207	0.14483	6.34539	0.658266			5.79265	0.653785
PS(34:4)			0.0576625	0.0140749	1.66646	0.295783			0.0929928	0.0101941
PS(35:1)			1.55382	0.121664
PS(35:2)									0.461364	0.052482
PS(35:3)									0.306318	0.0172547
PS(36:1)			4.6677	0.431171					0.571692	0.071116
PS(36:2)			7.5041	0.50671					11.6398	0.78134
PS(36:3)			2.95529	0.195341					5.07946	0.265584
PS(36:4)			2.18313	0.161611	3.20324	0.73416			1.96739	0.0990745
PS(36:5)			0.808729	0.0923279	1.61034	0.147081
PS(36:6)			0.12528	0.0219855

## Sheet: PE data
		S. cerevisiae		S. bayanus		K. thermotolerans		P. angusta		Y. lipolytica
	PL	average [%]	SD [%]	average [%]	SD [%]	average [%]	SD [%]	average [%]	SD [%]	average [%]	SD [%]
	PE(26:0)-0	0.052058	0.0130924	0.110175	0.019167
	PE(26:1)-0	0.05389	0.0287707	0.565688	0.220508
	PE(28:0)-0	0.13829	0.0566838
	PE(28:1)-0	0.736764	0.0827444	1.4406	0.410498	0.0267899	0.0130744
	PE(30:1)-0	0.546377	0.0698536	0.784892	0.0841117
	PE(30:2)-0	0.178687	0.0441394	0.458404	0.0985545	0.0448136	0.0160331
	PE(32:0)-0	0.23736	0.164609			0.377958	0.14531
	PE(32:1)-0	6.65282	1.09771	7.46593	0.0932676	2.66156	0.295185			0.353969	0.0151855
	PE(32:2)-0	19.7209	2.08836	45.2859	1.35378	8.19067	0.861016			0.25818	0.0966531
	PE(32:3)-0					0.427174	0.0604424			0.0232654	0.00373207
	PE(32:4)-0					0.047821	0.0175652
	PE(33:1)-0	0.323018	0.0347089							0.176537	0.0157819
	PE(33:2)-0	0.552365	0.0948122
	PE(34:0)-0					0.194901	0.0883127
	PE(34:1)-0	16.1771	1.61587	5.03302	0.565733	12.2988	2.16095	11.2201	0.283854	12.7118	0.8337
	PE(34:2)-0	50.788	0.956131	36.2899	1.07417	33.3841	2.03708	17.3174	1.41632	22.0929	0.439581
	PE(34:3)-0					17.4973	1.48074	1.02697	0.0856404	4.47893	0.470792
	PE(34:4)-0					4.79246	0.89956	0.159957	0.0192067
	PE(34:5)-0							0.048933	0.00526542
	PE(35:1)-0							0.312816	0.0241946	0.166544	0.188654
	PE(35:2)-0							0.665845	0.0711796	1.1625	0.111106
	PE(35:3)-0									0.330694	0.0358308
	PE(35:4)-0							0.110706	0.0138224
	PE(35:5)-0							0.130854	0.0196834
	PE(35:6)-0							0.0323011	0.00304098
	PE(36:1)-0					0.503723	0.0875786	1.67358	0.100284	0.362721	0.120803
	PE(36:2)-0	3.84235	0.209854	2.56555	0.267363	1.64469	0.198603	22.3423	0.903246	23.2015	0.441296
	PE(36:3)-0					5.58244	0.371776	17.1635	0.653683	26.5003	0.699023
	PE(36:4)-0					6.38327	1.72779	10.9316	0.188706	6.77159	0.278351
	PE(36:5)-0					5.13919	1.00068	13.4547	0.582629
	PE(36:6)-0					0.80234	0.15574	3.40854	0.114674
	PE(38:2)-0									0.675967	0.186143
	PE(38:3)-0									0.584546	0.229539
	PE(38:4)-0									0.0965184	0.00312002

## Sheet: DMPE data
		S. cerevisiae		S. bayanus		K. thermotolerans		P. angusta		Y. lipolytica
	PL	average [%]	SD [%]	average [%]	SD [%]	average [%]	SD [%]	average [%]	SD [%]	average [%]	SD [%]
	DMPE(32:1)-0	4.70284	0.69608
	DMPE(32:2)-0	34.777	2.16825
	DMPE(34:1)-0	10.6526	1.10333			10.5186	1.73554	31.184	0.939039	8.15089	3.16013
	DMPE(34:2)-0	49.8676	1.85588			37.6313	2.46218	7.747	0.603446	50.9249	3.47751
	DMPE(34:3)-0					38.4085	2.39737	3.64808	0.335934
	DMPE(34:4)-0					13.4416	3.35042
	DMPE(36:2)-0							13.0985	0.87255	8.00655	1.84123
	DMPE(36:3)-0							25.6406	1.39081	17.9177	1.52244
	DMPE(36:4)-0							6.39569	0.822196	11.7651	1.02287
	DMPE(36:5)-0							5.00418	1.30532
	DMPE(36:6)-0							7.28188	0.690272
	DMPE(38:2)-0									0.919445	0.19629
	DMPE(38:3)-0									2.31535	0.284251

## Sheet: PC data
	S. cerevisiae		S. bayanus		K. thermotolerans		P. angusta		Y. lipolytica
PL	average [%]	SD [%]	average [%]	SD [%]	average [%]	SD [%]	average [%]	SD [%]	average [%]	SD [%]
PC(24:0)-0			0.0998799	0.0795046
PC(24:1)-0			0.296865	0.200323
PC(26:0)-0	0.0700522	0.0276577
PC(26:1)-0	0.19284	0.0734438	0.967815	0.342377
PC(28:0)-0	0.249653	0.0485287	0.149137	0.0264814
PC(28:1)-0	1.61401	0.335687	1.51009	0.21952
PC(30:1)-0	1.94125	0.329291	1.03924	0.0417157	0.0972647	0.00854233
PC(30:2)-0	1.24816	0.340163
PC(31:1)-0	0.202474	0.0410203
PC(31:2)-0	0.226864	0.06552
PC(32:1)-0	8.83677	1.37846	5.67649	0.700739	3.17184	0.476455	0.290903	0.0928521	0.945375	0.0263429
PC(32:2)-0	33.3365	11.9539	63.301	1.41417	8.8438	1.05341			1.07677	0.062163
PC(32:3)-0					0.623231	0.0878763
PC(33:2)-0	0.153112	0.0458083					0.0808588	0.00509617	0.137802	0.00666871
PC(33:3)-0							0.0911803	0.0128437
PC(34:0)-0					0.142497	0.0921751
PC(34:1)-0	6.72617	3.24685	1.5367	0.35662	6.12562	1.24462	3.20457	0.190741	5.8777	0.314364
PC(34:2)-0	40.6778	12.2177	24.3225	1.04041	19.6902	1.52234	8.06523	0.497617	16.0165	0.287284
PC(34:3)-0					27.3765	1.16925	9.38532	0.245775	15.5334	0.308967
PC(34:4)-0					11.3889	1.60238	2.63093	0.18314	1.9436	0.0877441
PC(34:5)-0							0.556664	0.0528348
PC(34:6)-0							0.101734	0.0169223
PC(35:1)-0							0.126855	0.0124155
PC(35:2)-0							0.341037	0.0297941	0.327739	0.0273456
PC(35:3)-0							0.527394	0.0535103	0.707854	0.0773934
PC(35:4)-0							0.328416	0.0239091	0.283249	0.0462078
PC(35:5)-0							0.295861	0.0261005
PC(35:6)-0							0.255102	0.0229342
PC(36:1)-0	1.08974	0.272698			1.78728	0.501877	2.15607	0.23099	0.235804	0.092983
PC(36:2)-0	3.43463	0.743571	1.10034	0.208878	5.1761	0.662239	5.79798	0.189261	9.67727	0.449101
PC(36:3)-0					5.63582	0.290437	15.7597	0.39204	23.5401	0.626934
PC(36:4)-0					4.9597	0.878606	16.7768	0.44751	21.93	0.651781
PC(36:5)-0					4.83148	1.02115	19.812	0.978805
PC(36:6)-0							11.8315	0.32842
PC(36:7)-0							0.062608	0.005475
PC(38:2)-0							0.116229	0.0195602	0.363935	0.0683016
PC(38:3)-0					0.149644	0.0140884	0.395066	0.0307767	1.18425	0.0582495
PC(38:4)-0							0.87789	0.0599129	0.218533	0.0546718
PC(42:2)-0							0.0294073	0.00443232
PC(42:3)-0							0.0375753	0.00911352
PC(44:3)-0							0.0650481	0.0107965

## Sheet: PI data
	S. cerevisiae		S. bayanus		K. thermotolerans		P. angusta		Y. lipolytica
PL	average [%]	SD [%]	average [%]	SD [%]	average [%]	SD [%]	average [%]	SD [%]	average [%]	SD [%]
PI(26:0)-0	1.94709	0.382393
PI(26:1)-0	0.218034	0.0838051
PI(27:0)-0	0.0251951	0.00594738
PI(28:0)-0	4.95367	0.239998	12.8908	0.620944	0.574404	0.17893
PI(28:1)-0	0.671803	0.167175	0.673852	0.0542543	0.0350908	0.0101493
PI(30:0)-0	1.50791	0.185594	1.55574	0.0741332	0.529405	0.0496475
PI(30:1)-0	2.28582	0.468321	3.44348	0.195732	0.615452	0.0712922
PI(30:2)-0	0.162468	0.0600719	0.0646661	0.012154	0.0367941	0.0097083
PI(31:1)-0	0.154159	0.0318437	0.137102	0.00645186	0.0504446	0.00518499
PI(31:2)-0	0.0235716	0.0137314
PI(32:0)-0	1.25329	0.38995	1.27754	0.110011	1.31776	0.121834
PI(32:1)-0	20.9169	1.45244	37.1739	0.766949	11.2751	0.557853	0.532025	0.0217996	0.472986	0.0306878
PI(32:2)-0	6.03767	1.79526	3.83948	0.229083	2.93056	0.265471	0.387575	0.020641	0.538737	0.030745
PI(32:3)-0					0.33925	0.041037	0.0536595	0.00757111	0.0120577	0.000967615
PI(33:1)-0	0.39087	0.0287126	0.259482	0.0125677	0.285486	0.0324371	0.412913	0.0226113	0.429926	0.019881
PI(33:2)-0	0.0347137	0.00939132			0.142435	0.0124777	0.432438	0.113096	0.622412	0.0766455
PI(33:3)-0					0.0365098	0.0112843	0.115135	0.00957295
PI(34:0)-0	0.92069	0.360348	0.315624	0.0270005	0.516856	0.0628658
PI(34:1)-0	34.0791	2.23382	32.4034	0.861789	32.7337	1.27282	26.0338	0.565278	25.3517	1.43321
PI(34:2)-0	7.57357	2.11117	2.79402	0.0775665	24.5818	1.79371	26.8642	1.11409	37.1184	0.926741
PI(34:3)-0					5.46504	0.438517	5.80098	0.216191	7.74311	0.337787
PI(34:4)-0					0.968225	0.112174	0.221233	0.0219318	0.284196	0.0240912
PI(34:5)-0					0.02394	0.00761
PI(35:1)-0							0.783965	0.0482229
PI(35:2)-0							1.16221	0.124351	0.373394	0.0447945
PI(35:3)-0							0.264628	0.0220791	0.304635	0.0330433
PI(35:4)-0							0.101401	0.00462651	0.0964294	0.0132503
PI(35:5)-0							0.0399839	0.00354705
PI(36:0)-0	0.222286	0.0871728
PI(36:1)-0	15.8366	1.3943	2.97466	0.127183	8.78299	0.83059	5.66906	0.289573	1.07891	0.192188
PI(36:2)-0	0.784498	0.0938612	0.196232	0.00757977	4.51681	0.304711	10.7292	0.401733	11.3689	0.613679
PI(36:3)-0					1.37176	0.0407881	6.43722	0.221031	7.27033	0.701383
PI(36:4)-0					0.760227	0.0453047	7.38077	0.172091	6.86716	0.457816
PI(36:5)-0					0.480687	0.0643506	5.13369	0.3785
PI(36:6)-0					0.0907564	0.0153342	1.44395	0.151827
PI(40:1)-0					0.0493006	0.0052931
PI(42:0)-0					0.0697285	0.018192
PI(42:1)-0					0.260175	0.0486955			0.0324742	0.00574594
PI(42:2)-0					0.0665839	0.00962725			0.0342212	0.00752545
PI(43:1)-0					0.151115	0.034849
PI(43:2)-0					0.0930781	0.0247705
PI(44:1)-0					0.46374	0.0891543
PI(44:2)-0					0.334659	0.0685861
PI(44:3)-0					0.050214	0.0120272

## Sheet: PS data
	S. cerevisiae		P. angusta		K. thermotolerans		S. bayanus		Y. lipolytica
PL	average [%]	SD [%]	average [%]	SD [%]	average [%]	SD [%]	average [%]	SD [%]	average [%]	SD [%]
PS(26:0)-0							0.303648	0.020892
PS(26:1)-0							0.193379	0.0376883
PS(28:0)-0	0.453927	0.040573			0.126205	0.0735568	0.704714	0.0251291
PS(28:1)	0.450703	0.13703					1.25938	0.0904524
PS(30:0)-0	0.140972	0.0534394			0.258562	0.0823302	0.202917	0.0210871
PS(30:1)-0	1.0264	0.21755			0.427733	0.135216	1.61939	0.12137
PS(30:2)-0	0.0695508	0.0522676					0.250611	0.0380893
PS(32:0)-0	0.773603	0.343243			0.918765	0.162402
PS(32:1)-0	14.5183	1.10957			9.99125	0.751542	15.0479	0.882994	0.822143	0.100197
PS(32:2)-0	11.6589	3.73828	0.0953249	0.0110657	4.54833	0.446533	20.0302	1.17525	0.297556	0.0252928
PS(32:3)-0					0.30152	0.0759122
PS(33:1)-0	1.1406	0.20406
PS(33:2)-0									0.515222	0.0382318
PS(34:1)-0	29.5851	3.20955	53.2698	1.18849	39.0621	1.53813	18.0761	0.532482	44.8883	1.10323
PS(34:2)-0	40.182	1.78925	21.5771	1.05386	31.5401	1.85992	42.3117	2.23194	27.5651	0.957582
PS(34:3)-0			5.20207	0.14483	6.34539	0.658266			5.79265	0.653785
PS(34:4)-0			0.0576625	0.0140749	1.66646	0.295783			0.0929928	0.0101941
PS(35:1)-0			1.55382	0.121664
PS(35:2)-0									0.461364	0.052482
PS(35:3)-0									0.306318	0.0172547
PS(36:1)-0			4.6677	0.431171					0.571692	0.071116
PS(36:2)-0			7.5041	0.50671					11.6398	0.78134
PS(36:3)-0			2.95529	0.195341					5.07946	0.265584
PS(36:4)-0			2.18313	0.161611	3.20324	0.73416			1.96739	0.0990745
PS(36:5)-0			0.808729	0.0923279	1.61034	0.147081
PS(36:6)-0			0.12528	0.0219855
